# Supplementary material
Source: bioRxiv or medRxiv preprint supplement (https://www.biorxiv.org/highwire/filestream/7420/field_highwire_adjunct_files/0/027813-1.pdf)
Supplement: Supplementary file [file 027813-1.pdf]

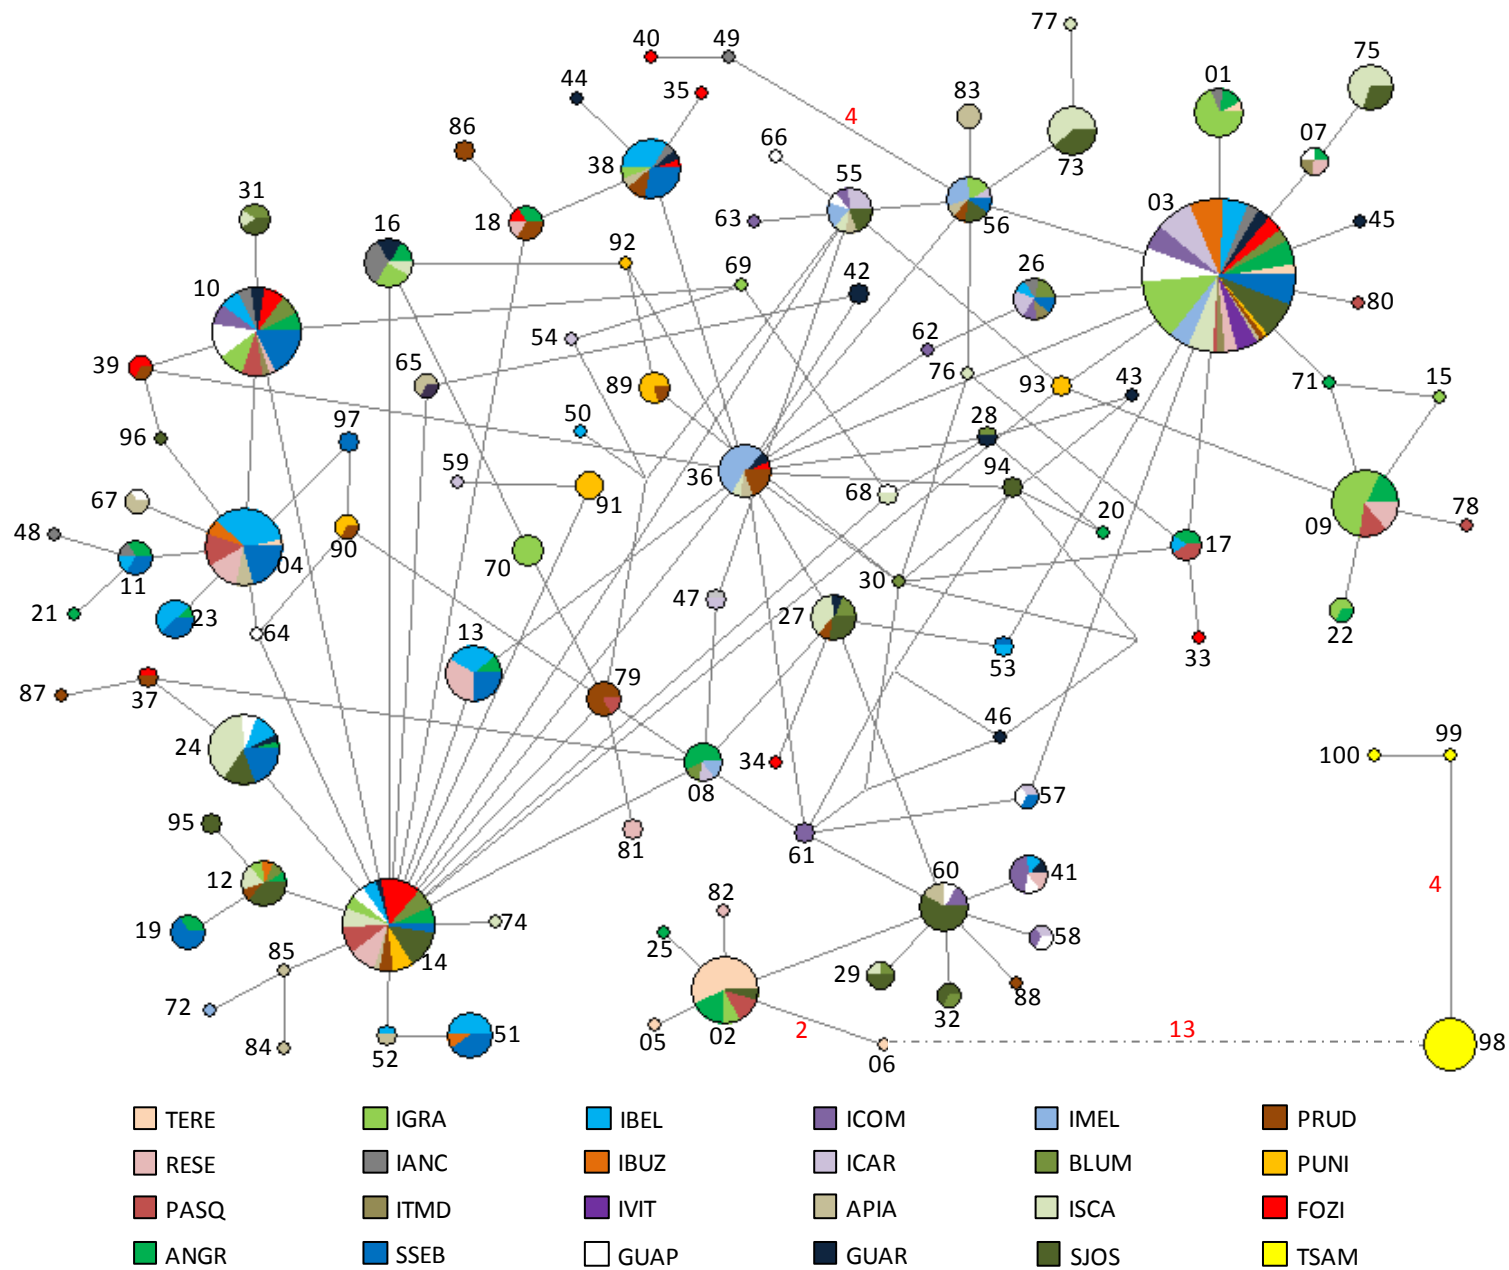

**Figure S1.** MtDNA haplotype network from 24 populations of *Bombus morio*. Each colour refers to one population. The 100 haplotypes are denominated by black numbers. Line between haplotypes indicates one nucleotide substitution and red numbers indicate the number of nucleotide substitutions greater than one. Population abbreviations as in Table 1.

**Table S1.** Information about sampling sites. RJ: Rio de Janeiro. MG: Minas Gerais. SP: São Paulo. PR: Paraná. SC: Santa Catarina. Geographic coordinates are in degrees, minutes and seconds. N: number of sampled *Bombus morio* bees. Population abbreviations as in Table 1.

| Population | Site code | City           | State | Coordinates                       | N |
|------------|-----------|----------------|-------|-----------------------------------|---|
| TERE       | PETRO 1   | Petrópolis     | RJ    | 22° 23' 17.3" S / 43° 7' 57.3" W  | 2 |
| TERE       | PETRO 2   | Petrópolis     | RJ    | 22° 25' 9.4" S / 43° 10' 25.8" W  | 1 |
| TERE       | TERE 19   | Teresópolis    | RJ    | 22° 27' 8.7" S / 42° 57' 53.8" W  | 1 |
| TERE       | TERE 29   | Teresópolis    | RJ    | 22° 26' 45.9" S / 42° 58' 59.2" W | 3 |
| TERE       | TERE 3    | Teresópolis    | RJ    | 22° 26' 53.1" S / 42° 58' 20.2" W | 1 |
| TERE       | TERE 30   | Teresópolis    | RJ    | 22° 26' 47.2" S / 42° 59' 15.4" W | 2 |
| TERE       | TERE 31   | Teresópolis    | RJ    | 22° 26' 21.9" S / 42° 59' 13.3" W | 3 |
| TERE       | TERE 32   | Teresópolis    | RJ    | 22° 26' 9.5" S / 42° 58' 25.2" W  | 1 |
| TERE       | TERE 33   | Teresópolis    | RJ    | 22° 24' 57.6" S / 42° 57' 25.2" W | 2 |
| TERE       | TERE 34   | Teresópolis    | RJ    | 22° 24' 49.2" S / 42° 59' 4.7" W  | 1 |
| TERE       | TERE 35   | Teresópolis    | RJ    | 22° 24' 42.3" S / 42° 57' 41.6" W | 2 |
| TERE       | TERE 4    | Teresópolis    | RJ    | 22° 26' 7.7" S / 42° 58' 28.3" W  | 1 |
| RESE       | ITATI 3   | Itatiaia       | RJ    | 22° 29' 57.1" S / 44° 33' 55.1" W | 5 |
| RESE       | ITATI 4   | Itatiaia       | RJ    | 22° 28' 35.3" S / 44° 34' 37.8" W | 6 |
| RESE       | ITATI 5   | Itatiaia       | RJ    | 22° 27' 47.8" S / 44° 35' 26.8" W | 1 |
| RESE       | ITATI 6   | Itatiaia       | RJ    | 22° 29' 4.2" S / 44° 33' 59.4" W  | 2 |
| RESE       | PENE 24   | Resende        | RJ    | 22° 26' 47.3" S / 44° 31' 51.6" W | 1 |
| RESE       | PENE 27   | Resende        | RJ    | 22° 25' 39.7" S / 44° 32' 38.8" W | 1 |
| RESE       | PENE 29   | Resende        | RJ    | 22° 27' 1.7" S / 44° 31' 29.1" W  | 1 |
| RESE       | PENE 30   | Resende        | RJ    | 22° 26' 33.2" S / 44° 31' 31.1" W | 3 |
| RESE       | PENE 31   | Resende        | RJ    | 22° 25' 38.4" S / 44° 32' 7.1" W  | 2 |
| RESE       | PENE 34   | Resende        | RJ    | 22° 27' 34.4" S / 44° 30' 7.1" W  | 5 |
| PASQ       | ITAMO 15  | Itamonte       | MG    | 22° 17' 18.2" S / 44° 52' 5.8" W  | 3 |
| PASQ       | ITAMO 5   | Itamonte       | MG    | 22° 18' 50.4" S / 44° 51' 15.8" W | 3 |
| PASQ       | ITAMO 8   | Itamonte       | MG    | 22° 17' 28.7" S / 44° 51' 39.5" W | 1 |
| PASQ       | ITANH 4   | Itanhandu      | MG    | 22° 17' 58.7" S / 44° 56' 24.9" W | 4 |
| PASQ       | ITANH 5   | Itanhandu      | MG    | 22° 17' 56.7" S / 44° 56' 4.1" W  | 1 |
| PASQ       | ITANH 6   | Itanhandu      | MG    | 22° 18' 12.2" S / 44° 55' 41.3" W | 2 |
| PASQ       | PASSA 3   | Passa Quatro   | MG    | 22° 24' 7.6" S / 44° 58' 44.8" W  | 6 |
| PASQ       | PASSA 8   | Passa Quatro   | MG    | 22° 23' 18.3" S / 44° 58' 8.4" W  | 4 |
| PASQ       | POUSOA 3  | Pouso Alto     | MG    | 22° 12' 10.7" S / 44° 57' 50.3" W | 2 |
| ANGR       | ANGRA 18  | Angra dos Reis | RJ    | 23° 2' 23.8" S / 44° 11' 6.3" W   | 2 |
| ANGR       | ANGRA 26  | Angra dos Reis | RJ    | 22° 58' 57.4" S / 44° 18' 36.4" W | 5 |
| ANGR       | ANGRA 29  | Angra dos Reis | RJ    | 22° 58' 1.2" S / 44° 18' 24.5" W  | 1 |
| ANGR       | ANGRA 30  | Angra dos Reis | RJ    | 22° 57' 53" S / 44° 26' 23.7" W   | 1 |
| ANGR       | ANGRA 31  | Angra dos Reis | RJ    | 23° 0' 47.2" S / 44° 17' 15" W    | 6 |
| ANGR       | ANGRA 32  | Angra dos Reis | RJ    | 22° 59' 59.2" S / 44° 14' 13.4" W | 4 |
| ANGR       | ANGRA 33  | Angra dos Reis | RJ    | 22° 56' 51.4" S / 44° 19' 15.8" W | 2 |
| ANGR       | PAR 1     | Parati         | RJ    | 23° 18' 30.7" S / 44° 42' 12.5" W | 3 |
| ANGR       | PAR 11    | Angra dos Reis | RJ    | 23° 0' 42.9" S / 44° 31' 43.2" W  | 1 |

|      |         |                |    |                                   |    |
|------|---------|----------------|----|-----------------------------------|----|
| ANGR | PAR 12  | Angra dos Reis | RJ | 23° 1' 31.4" S / 44° 30' 58.9" W  | 1  |
| ANGR | PAR 13  | Angra dos Reis | RJ | 23° 1' 28.9" S / 44° 30' 5.9" W   | 1  |
| ANGR | PAR 15  | Angra dos Reis | RJ | 22° 56' 2.7" S / 44° 23' 17.8" W  | 1  |
| ANGR | PAR 16  | Angra dos Reis | RJ | 22° 56' 29.5" S / 44° 23' 12.3" W | 3  |
| ANGR | PAR 17  | Angra dos Reis | RJ | 22° 57' 21.2" S / 44° 19' 42.5" W | 4  |
| ANGR | PAR 18  | Angra dos Reis | RJ | 22° 53' 34.1" S / 44° 17' 11" W   | 2  |
| ANGR | PAR 2   | Parati         | RJ | 23° 16' 48.5" S / 44° 41' 28" W   | 2  |
| ANGR | PAR 5   | Parati         | RJ | 23° 12' 17.2" S / 44° 43' 23.6" W | 4  |
| ANGR | PAR 6   | Parati         | RJ | 23° 12' 53.8" S / 44° 43' 40.6" W | 2  |
| ANGR | PAR 7   | Parati         | RJ | 23° 12' 17.1" S / 44° 43' 50.5" W | 3  |
| ANGR | PAR 8   | Parati         | RJ | 23° 8' 22.6" S / 44° 43' 26.9" W  | 3  |
| IGRA | IGRA 1  | Angra dos Reis | RJ | 23° 8' 34.7" S / 44° 10' 4.3" W   | 1  |
| IGRA | IGRA 10 | Angra dos Reis | RJ | 23° 7' 53.7" S / 44° 10' 36.7" W  | 1  |
| IGRA | IGRA 12 | Angra dos Reis | RJ | 23° 7' 4.5" S / 44° 12' 9.8" W    | 1  |
| IGRA | IGRA 18 | Angra dos Reis | RJ | 23° 8' 21" S / 44° 18' 38.9" W    | 2  |
| IGRA | IGRA 19 | Angra dos Reis | RJ | 23° 8' 38.9" S / 44° 19' 7.6" W   | 1  |
| IGRA | IGRA 21 | Angra dos Reis | RJ | 23° 10' 23.9" S / 44° 20' 24.4" W | 1  |
| IGRA | IGRA 24 | Angra dos Reis | RJ | 23° 10' 50.3" S / 44° 20' 29.6" W | 5  |
| IGRA | IGRA 26 | Angra dos Reis | RJ | 23° 8' 20.4" S / 44° 10' 9.4" W   | 1  |
| IGRA | IGRA 27 | Angra dos Reis | RJ | 23° 8' 29.2" S / 44° 9' 38" W     | 10 |
| IGRA | IGRA 29 | Angra dos Reis | RJ | 23° 8' 32" S / 44° 8' 26.1" W     | 1  |
| IGRA | IGRA 3  | Angra dos Reis | RJ | 23° 9' 5" S / 44° 10' 6.4" W      | 1  |
| IGRA | IGRA 32 | Angra dos Reis | RJ | 23° 8' 31" S / 44° 9' 41.2" W     | 1  |
| IGRA | IGRA 37 | Angra dos Reis | RJ | 23° 8' 3.4" S / 44° 9' 2.6" W     | 8  |
| IGRA | IGRA 41 | Angra dos Reis | RJ | 23° 8' 26.9" S / 44° 10' 11.8" W  | 1  |
| IGRA | IGRA 43 | Angra dos Reis | RJ | 23° 9' 54.4" S / 44° 10' 45.4" W  | 2  |
| IGRA | IGRA 44 | Angra dos Reis | RJ | 23° 10' 0.4" S / 44° 10' 57.3" W  | 2  |
| IGRA | IGRA 45 | Angra dos Reis | RJ | 23° 10' 30.4" S / 44° 11' 8.9" W  | 2  |
| IGRA | IGRA 46 | Angra dos Reis | RJ | 23° 9' 23" S / 44° 8' 28.6" W     | 5  |
| IGRA | IGRA 47 | Angra dos Reis | RJ | 23° 9' 43.9" S / 44° 7' 38" W     | 1  |
| IGRA | IGRA 48 | Angra dos Reis | RJ | 23° 9' 33.1" S / 44° 8' 21.6" W   | 1  |
| IGRA | IGRA 49 | Angra dos Reis | RJ | 23° 6' 35.6" S / 44° 14' 58.2" W  | 1  |
| IGRA | IGRA 5  | Angra dos Reis | RJ | 23° 10' 41.7" S / 44° 11' 14.7" W | 1  |
| IGRA | IGRA 50 | Angra dos Reis | RJ | 23° 6' 55.4" S / 44° 15' 27.9" W  | 1  |
| IGRA | IGRA 52 | Angra dos Reis | RJ | 23° 7' 34.8" S / 44° 16' 36" W    | 1  |
| IGRA | IGRA 53 | Angra dos Reis | RJ | 23° 8' 12.9" S / 44° 17' 28.6" W  | 1  |
| IGRA | IGRA 54 | Angra dos Reis | RJ | 23° 9' 19.2" S / 44° 19' 39.1" W  | 3  |
| IGRA | IGRA 55 | Angra dos Reis | RJ | 23° 9' 22.1" S / 44° 20' 5.8" W   | 3  |
| IGRA | IGRA 56 | Angra dos Reis | RJ | 23° 10' 43.9" S / 44° 20' 33.9" W | 2  |
| IGRA | IGRA 58 | Angra dos Reis | RJ | 23° 9' 53.4" S / 44° 21' 0.4" W   | 2  |
| IGRA | IGRA 59 | Angra dos Reis | RJ | 23° 9' 37.1" S / 44° 21' 3.4" W   | 1  |
| IGRA | IGRA 7  | Angra dos Reis | RJ | 23° 10' 57.1" S / 44° 11' 19.6" W | 1  |
| IANC | IANC 10 | Ubatuba        | SP | 23° 32' 26.3" S / 45° 3' 58.7" W  | 7  |
| IANC | IANC 11 | Ubatuba        | SP | 23° 32' 9.3" S / 45° 3' 42.5" W   | 1  |

|      |          |               |    |                                   |    |
|------|----------|---------------|----|-----------------------------------|----|
| IANC | IANC 12  | Ubatuba       | SP | 23° 32' 44.6" S / 45° 3' 27.3" W  | 1  |
| IANC | IANC 3   | Ubatuba       | SP | 23° 32' 22.4" S / 45° 3' 48.1" W  | 10 |
| ITMD | ITAMAN 1 | Caraguatatuba | SP | 23° 35' 59.2" S / 45° 17' 40.4" W | 3  |
| ITMD | ITAMAN 2 | Caraguatatuba | SP | 23° 35' 36.6" S / 45° 17' 26.9" W | 7  |
| SSEB | CARA 1   | Caraguatatuba | SP | 23° 42' 29.6" S / 45° 25' 59.2" W | 1  |
| SSEB | SSEB 11  | São Sebastião | SP | 23° 49' 19" S / 45° 27' 24.1" W   | 2  |
| SSEB | SSEB 12  | São Sebastião | SP | 23° 49' 32.2" S / 45° 26' 14.2" W | 1  |
| SSEB | SSEB 13  | São Sebastião | SP | 23° 43' 49" S / 45° 24' 4.8" W    | 1  |
| SSEB | SSEB 14  | São Sebastião | SP | 23° 43' 21.7" S / 45° 25' 31.7" W | 1  |
| SSEB | SSEB 17  | São Sebastião | SP | 23° 47' 31.6" S / 45° 24' 11.4" W | 2  |
| SSEB | SSEB 18  | São Sebastião | SP | 23° 47' 29" S / 45° 24' 6.4" W    | 1  |
| SSEB | SSEB 20  | São Sebastião | SP | 23° 46' 50.7" S / 45° 23' 54.6" W | 1  |
| SSEB | SSEB 21  | São Sebastião | SP | 23° 46' 43.6" S / 45° 24' 11.3" W | 3  |
| SSEB | SSEB 26  | São Sebastião | SP | 23° 43' 55.1" S / 45° 24' 2" W    | 4  |
| SSEB | SSEB 28  | São Sebastião | SP | 23° 49' 13" S / 45° 24' 23.9" W   | 1  |
| SSEB | SSEB 29  | São Sebastião | SP | 23° 49' 8.1" S / 45° 24' 39.2" W  | 1  |
| SSEB | SSEB 3   | São Sebastião | SP | 23° 45' 29.9" S / 45° 24' 48.8" W | 1  |
| SSEB | SSEB 34  | São Sebastião | SP | 23° 48' 59.8" S / 45° 31' 56.8" W | 5  |
| SSEB | SSEB 35  | São Sebastião | SP | 23° 48' 3" S / 45° 32' 54.3" W    | 1  |
| SSEB | SSEB 36  | São Sebastião | SP | 23° 47' 58.2" S / 45° 32' 46.8" W | 2  |
| SSEB | SSEB 37  | São Sebastião | SP | 23° 47' 55.1" S / 45° 32' 40.1" W | 3  |
| SSEB | SSEB 38  | São Sebastião | SP | 23° 49' 19.3" S / 45° 26' 0.9" W  | 5  |
| SSEB | SSEB 39  | São Sebastião | SP | 23° 49' 15.8" S / 45° 27' 27.9" W | 5  |
| SSEB | SSEB 40  | São Sebastião | SP | 23° 49' 57.2" S / 45° 30' 28.7" W | 2  |
| SSEB | SSEB 42  | São Sebastião | SP | 23° 45' 26.9" S / 45° 25' 8.3" W  | 1  |
| SSEB | SSEB 43  | São Sebastião | SP | 23° 45' 59.7" S / 45° 24' 40.4" W | 4  |
| SSEB | SSEB 44  | São Sebastião | SP | 23° 46' 30.4" S / 45° 24' 25" W   | 1  |
| SSEB | SSEB 45  | São Sebastião | SP | 23° 47' 13.4" S / 45° 24' 9.4" W  | 2  |
| SSEB | SSEB 46  | São Sebastião | SP | 23° 49' 21.8" S / 45° 25' 15.6" W | 2  |
| SSEB | SSEB 5   | São Sebastião | SP | 23° 47' 14.6" S / 45° 23' 55" W   | 1  |
| SSEB | SSEB 6   | São Sebastião | SP | 23° 48' 23.5" S / 45° 24' 5.1" W  | 1  |
| IBEL | IBELA 14 | Ilhabela      | SP | 23° 43' 22.4" S / 45° 19' 43.2" W | 1  |
| IBEL | IBELA 15 | Ilhabela      | SP | 23° 43' 50.5" S / 45° 20' 29" W   | 1  |
| IBEL | IBELA 17 | Ilhabela      | SP | 23° 48' 56" S / 45° 22' 2.1" W    | 1  |
| IBEL | IBELA 18 | Ilhabela      | SP | 23° 49' 1.7" S / 45° 21' 52.9" W  | 1  |
| IBEL | IBELA 2  | Ilhabela      | SP | 23° 50' 23.2" S / 45° 21' 36.7" W | 1  |
| IBEL | IBELA 20 | Ilhabela      | SP | 23° 51' 43.3" S / 45° 25' 29" W   | 1  |
| IBEL | IBELA 22 | Ilhabela      | SP | 23° 55' 11" S / 45° 27' 14.1" W   | 1  |
| IBEL | IBELA 26 | Ilhabela      | SP | 23° 53' 7.3" S / 45° 27' 2.3" W   | 1  |
| IBEL | IBELA 28 | Ilhabela      | SP | 23° 51' 44.9" S / 45° 25' 39.6" W | 1  |
| IBEL | IBELA 29 | Ilhabela      | SP | 23° 51' 11.6" S / 45° 24' 43.9" W | 1  |
| IBEL | IBELA 3  | Ilhabela      | SP | 23° 56' 10" S / 45° 25' 41" W     | 3  |
| IBEL | IBELA 30 | Ilhabela      | SP | 23° 49' 29.3" S / 45° 22' 35.2" W | 9  |
| IBEL | IBELA 31 | Ilhabela      | SP | 23° 46' 43.7" S / 45° 21' 28" W   | 1  |

|      |            |               |    |                                   |   |
|------|------------|---------------|----|-----------------------------------|---|
| IBEL | IBELA 33   | Ilhabela      | SP | 23° 45' 36" S / 45° 20' 25.7" W   | 1 |
| IBEL | IBELA 34   | Ilhabela      | SP | 23° 43' 58.9" S / 45° 20' 30.4" W | 1 |
| IBEL | IBELA 37   | Ilhabela      | SP | 23° 47' 14.9" S / 45° 21' 30.2" W | 1 |
| IBEL | IBELA 38   | Ilhabela      | SP | 23° 49' 28.1" S / 45° 21' 11.1" W | 1 |
| IBEL | IBELA 41   | Ilhabela      | SP | 23° 51' 4.9" S / 45° 17' 15.4" W  | 1 |
| IBEL | IBELA 42   | Ilhabela      | SP | 23° 49' 22.1" S / 45° 22' 29.3" W | 2 |
| IBEL | IBELA 43   | Ilhabela      | SP | 23° 48' 58.5" S / 45° 21' 58" W   | 2 |
| IBEL | IBELA 50   | Ilhabela      | SP | 23° 50' 55.7" S / 45° 24' 44.5" W | 1 |
| IBEL | IBELA 51   | Ilhabela      | SP | 23° 47' 59.4" S / 45° 21' 43.3" W | 2 |
| IBEL | IBELA 52   | Ilhabela      | SP | 23° 48' 50.1" S / 45° 21' 47.7" W | 9 |
| IBEL | IBELA 53   | Ilhabela      | SP | 23° 46' 32.6" S / 45° 21' 13.4" W | 3 |
| IBEL | IBELA 54   | Ilhabela      | SP | 23° 46' 32.3" S / 45° 21' 22.7" W | 2 |
| IBEL | IBELA 55   | Ilhabela      | SP | 23° 47' 26.6" S / 45° 21' 36.9" W | 2 |
| IBEL | IBELA 58   | Ilhabela      | SP | 23° 51' 6.5" S / 45° 24' 39.2" W  | 1 |
| IBUZ | IBUZIOS 1  | Ilhabela      | SP | 23° 47' 50" S / 45° 8' 12" W      | 7 |
| IBUZ | IBUZIOS 2  | Ilhabela      | SP | 23° 47' 52" S / 45° 8' 16" W      | 5 |
| IBUZ | IBUZIOS 3  | Ilhabela      | SP | 23° 47' 32.3" S / 45° 8' 45.1" W  | 1 |
| IVIT | IVITORIA 2 | Ilhabela      | SP | 23° 44' 30" S / 45° 1' 15.6" W    | 1 |
| IVIT | IVITORIA 3 | Ilhabela      | SP | 23° 44' 42.8" S / 45° 1' 18.7" W  | 1 |
| IVIT | IVITORIA 4 | Ilhabela      | SP | 23° 44' 41.2" S / 45° 1' 14.3" W  | 1 |
| IVIT | IVITORIA 5 | Ilhabela      | SP | 23° 44' 35.7" S / 45° 1' 12.8" W  | 2 |
| GUAP | IGUA 19    | Iguape        | SP | 24° 38' 20.1" S / 47° 30' 0.4" W  | 2 |
| GUAP | IGUA 28    | Iguape        | SP | 24° 38' 30.8" S / 47° 30' 17.3" W | 2 |
| GUAP | IGUA 29    | Iguape        | SP | 24° 36' 44.4" S / 47° 31' 34.6" W | 4 |
| GUAP | IGUA 30    | Iguape        | SP | 24° 34' 17.8" S / 47° 33' 8.2" W  | 4 |
| GUAP | IGUA 31    | Iguape        | SP | 24° 42' 29.3" S / 47° 33' 13.3" W | 6 |
| GUAP | IGUA 33    | Iguape        | SP | 24° 38' 21.5" S / 47° 29' 32.3" W | 8 |
| GUAP | IGUA 34    | Iguape        | SP | 24° 41' 10.9" S / 47° 29' 49.3" W | 1 |
| GUAP | IGUA 35    | Iguape        | SP | 24° 41' 10.4" S / 47° 28' 49.4" W | 3 |
| GUAP | IGUA 36    | Iguape        | SP | 24° 42' 5.2" S / 47° 34' 49.3" W  | 1 |
| ICOM | ICOMP 10   | Ilha Comprida | SP | 24° 43' 22.8" S / 47° 30' 23.5" W | 1 |
| ICOM | ICOMP 13   | Ilha Comprida | SP | 24° 43' 40.5" S / 47° 32' 22.4" W | 5 |
| ICOM | ICOMP 2    | Ilha Comprida | SP | 24° 44' 53" S / 47° 33' 24" W     | 1 |
| ICOM | ICOMP 22   | Ilha Comprida | SP | 24° 42' 54.1" S / 47° 31' 4.9" W  | 2 |
| ICOM | ICOMP 29   | Ilha Comprida | SP | 24° 53' 33.1" S / 47° 48' 1.2" W  | 2 |
| ICOM | ICOMP 3    | Ilha Comprida | SP | 24° 47' 29.7" S / 47° 37' 4.5" W  | 1 |
| ICOM | ICOMP 30   | Ilha Comprida | SP | 24° 53' 33.3" S / 47° 47' 55.5" W | 1 |
| ICOM | ICOMP 31   | Ilha Comprida | SP | 24° 53' 51.9" S / 47° 47' 31.8" W | 2 |
| ICOM | ICOMP 32   | Ilha Comprida | SP | 24° 53' 39.5" S / 47° 47' 48" W   | 1 |
| ICOM | ICOMP 33   | Ilha Comprida | SP | 24° 43' 35.2" S / 47° 33' 28" W   | 1 |
| ICOM | ICOMP 4    | Ilha Comprida | SP | 24° 48' 34.9" S / 47° 38' 28.4" W | 1 |
| ICOM | ICOMP 5    | Ilha Comprida | SP | 24° 45' 33.9" S / 47° 34' 27.7" W | 1 |
| ICOM | ICOMP 6    | Ilha Comprida | SP | 24° 44' 11.3" S / 47° 32' 2" W    | 1 |
| ICOM | ICOMP 9    | Ilha Comprida | SP | 24° 43' 16.5" S / 47° 30' 20.7" W | 1 |

|      |              |           |    |                                   |   |
|------|--------------|-----------|----|-----------------------------------|---|
| ICAR | ICARD 1      | Cananéia  | SP | 25° 12' 49.9" S / 47° 59' 37.3" W | 2 |
| ICAR | ICARD 10     | Cananéia  | SP | 25° 3' 53.8" S / 47° 54' 43.7" W  | 2 |
| ICAR | ICARD 11     | Cananéia  | SP | 25° 3' 52.2" S / 47° 54' 52.9" W  | 1 |
| ICAR | ICARD 12     | Cananéia  | SP | 25° 3' 53.2" S / 47° 54' 56.5" W  | 1 |
| ICAR | ICARD 13     | Cananéia  | SP | 25° 5' 36" S / 47° 55' 45.9" W    | 1 |
| ICAR | ICARD 14     | Cananéia  | SP | 25° 5' 38" S / 47° 55' 44.8" W    | 1 |
| ICAR | ICARD 2      | Cananéia  | SP | 25° 12' 45.3" S / 47° 59' 32.1" W | 2 |
| ICAR | ICARD 3      | Cananéia  | SP | 25° 13' 18.9" S / 48° 0' 14.6" W  | 2 |
| ICAR | ICARD 4      | Cananéia  | SP | 25° 13' 24.1" S / 48° 0' 21.2" W  | 1 |
| ICAR | ICARD 5      | Cananéia  | SP | 25° 13' 30.6" S / 48° 0' 29.2" W  | 1 |
| ICAR | ICARD 6      | Cananéia  | SP | 25° 13' 44.9" S / 48° 0' 47" W    | 2 |
| ICAR | ICARD 7      | Cananéia  | SP | 25° 4' 7.9" S / 47° 55' 13.8" W   | 1 |
| ICAR | ICARD 8      | Cananéia  | SP | 25° 3' 54.4" S / 47° 55' 0.4" W   | 3 |
| ICAR | ICARD 9      | Cananéia  | SP | 25° 3' 52.6" S / 47° 54' 44.9" W  | 2 |
| APIA | APIAÍ 1      | Apiáí     | SP | 24° 30' 28" S / 48° 50' 23" W     | 1 |
| APIA | APIAÍ 13     | Apiáí     | SP | 24° 31' 13.9" S / 48° 43' 47" W   | 1 |
| APIA | APIAÍ 14     | Apiáí     | SP | 24° 31' 54.1" S / 48° 43' 25.4" W | 1 |
| APIA | APIAÍ 16     | Apiáí     | SP | 24° 30' 22.9" S / 48° 50' 11.1" W | 1 |
| APIA | APIAÍ 17     | Apiáí     | SP | 24° 31' 22.4" S / 48° 50' 9.5" W  | 1 |
| APIA | APIAÍ 2      | Apiáí     | SP | 24° 30' 27" S / 48° 50' 36" W     | 1 |
| APIA | APIAÍ 20     | Apiáí     | SP | 24° 32' 27.3" S / 48° 48' 37.8" W | 1 |
| APIA | APIAÍ 21     | Apiáí     | SP | 24° 32' 15.5" S / 48° 49' 53.5" W | 1 |
| APIA | APIAÍ 8      | Apiáí     | SP | 24° 30' 57" S / 48° 51' 12" W     | 1 |
| APIA | IPOR 1       | Iporanga  | SP | 24° 33' 52" S / 48° 35' 18.2" W   | 1 |
| APIA | IPOR 10      | Iporanga  | SP | 24° 35' 48.9" S / 48° 34' 37" W   | 1 |
| APIA | IPOR 17      | Iporanga  | SP | 24° 34' 49.6" S / 48° 35' 31.8" W | 1 |
| APIA | IPOR 2       | Iporanga  | SP | 24° 32' 51.5" S / 48° 35' 12.1" W | 1 |
| APIA | IPOR 21      | Iporanga  | SP | 24° 34' 58" S / 48° 37' 48.7" W   | 1 |
| APIA | IPOR 23      | Iporanga  | SP | 24° 33' 9.6" S / 48° 40' 44" W    | 1 |
| APIA | IPOR 3       | Iporanga  | SP | 24° 31' 52" S / 48° 35' 7.8" W    | 1 |
| APIA | IPOR 5       | Iporanga  | SP | 24° 34' 9.9" S / 48° 33' 30.8" W  | 1 |
| APIA | IPOR 6       | Iporanga  | SP | 24° 35' 27" S / 48° 35' 50.1" W   | 1 |
| APIA | IPOR 8       | Iporanga  | SP | 24° 32' 19.2" S / 48° 41' 49" W   | 1 |
| APIA | IPOR 9       | Iporanga  | SP | 24° 32' 15.4" S / 48° 43' 15" W   | 1 |
| GUAR | GUARATUBA 10 | Itapoá    | SC | 26° 1' 17" S / 48° 38' 17.4" W    | 1 |
| GUAR | GUARATUBA 11 | Itapoá    | SC | 26° 0' 38.2" S / 48° 36' 20.3" W  | 1 |
| GUAR | GUARATUBA 13 | Itapoá    | SC | 26° 6' 28.6" S / 48° 36' 14.1" W  | 1 |
| GUAR | GUARATUBA 17 | Guaratuba | PR | 25° 52' 28.2" S / 48° 34' 38.6" W | 2 |
| GUAR | GUARATUBA 2  | Guaratuba | PR | 25° 52' 43" S / 48° 34' 23" W     | 1 |
| GUAR | GUARATUBA 20 | Guaratuba | PR | 25° 52' 31" S / 48° 34' 20.1" W   | 1 |
| GUAR | GUARATUBA 24 | Guaratuba | PR | 25° 53' 40.4" S / 48° 34' 20" W   | 1 |
| GUAR | GUARATUBA 25 | Guaratuba | PR | 25° 54' 28" S / 48° 34' 27.1" W   | 2 |
| GUAR | GUARATUBA 28 | Guaratuba | PR | 26° 1' 24.4" S / 48° 36' 36.9" W  | 1 |
| GUAR | GUARATUBA 29 | Guaratuba | PR | 26° 0' 37.8" S / 48° 36' 23.4" W  | 1 |

|      |              |                        |    |                                   |    |
|------|--------------|------------------------|----|-----------------------------------|----|
| GUAR | GUARATUBA 32 | Guaratuba              | PR | 26° 2' 55.6" S / 48° 36' 55.9" W  | 1  |
| GUAR | GUARATUBA 36 | Guaratuba              | PR | 26° 5' 9.6" S / 48° 36' 26.9" W   | 1  |
| GUAR | GUARATUBA 8  | Guaratuba              | PR | 25° 55' 44.6" S / 48° 43' 43.3" W | 1  |
| GUAR | GUARATUBA 9  | Garuva                 | SC | 25° 59' 5.7" S / 48° 42' 44.1" W  | 1  |
| GUAR | ITAPEM 1     | Itapoá                 | SC | 26° 4' 51.4" S / 48° 36' 25.1" W  | 2  |
| GUAR | MATIN 1      | Matinhos               | PR | 25° 49' 45.4" S / 48° 32' 58.1" W | 2  |
| GUAR | MATIN 2      | Matinhos               | PR | 25° 49' 24.3" S / 48° 32' 33.1" W | 1  |
| IMEL | IMEL 1       | Paranaguá              | PR | 25° 34' 17.9" S / 48° 18' 37.6" W | 2  |
| IMEL | IMEL 10      | Paranaguá              | PR | 25° 32' 5.3" S / 48° 18' 43.7" W  | 1  |
| IMEL | IMEL 2       | Paranaguá              | PR | 25° 33' 53.6" S / 48° 18' 11.6" W | 1  |
| IMEL | IMEL 3       | Paranaguá              | PR | 25° 32' 37.5" S / 48° 17' 59.4" W | 1  |
| IMEL | IMEL 4       | Paranaguá              | PR | 25° 32' 33.2" S / 48° 18' 5" W    | 5  |
| IMEL | IMEL 5       | Paranaguá              | PR | 25° 29' 43.9" S / 48° 19' 21" W   | 1  |
| IMEL | IMEL 6       | Paranaguá              | PR | 25° 33' 55.3" S / 48° 18' 11.9" W | 10 |
| IMEL | IMEL 7       | Paranaguá              | PR | 25° 32' 22.6" S / 48° 17' 48.6" W | 1  |
| IMEL | IMEL 8       | Paranaguá              | PR | 25° 32' 51" S / 48° 17' 43" W     | 1  |
| BLUM | BLUME 1      | Blumenau               | SC | 26° 53' 7.3" S / 49° 10' 12.9" W  | 1  |
| BLUM | BLUME 14     | Blumenau               | SC | 26° 54' 5.6" S / 49° 2' 57.6" W   | 1  |
| BLUM | BLUME 16     | Blumenau               | SC | 26° 54' 49.1" S / 49° 3' 3.8" W   | 1  |
| BLUM | BLUME 21     | Blumenau               | SC | 26° 53' 17.7" S / 49° 4' 27.6" W  | 2  |
| BLUM | BLUME 24     | Blumenau               | SC | 26° 55' 52.3" S / 49° 4' 5.2" W   | 2  |
| BLUM | BLUME 27     | Blumenau               | SC | 26° 58' 22.7" S / 49° 4' 34.5" W  | 2  |
| BLUM | BLUME 28     | Blumenau               | SC | 26° 59' 15.4" S / 49° 4' 50.2" W  | 1  |
| BLUM | BLUME 3      | Indaial                | SC | 26° 53' 21.3" S / 49° 13' 25.3" W | 1  |
| BLUM | BLUME 33     | Indaial                | SC | 26° 57' 10.8" S / 49° 17' 8.8" W  | 2  |
| BLUM | BLUME 34     | Indaial                | SC | 26° 54' 10.7" S / 49° 13' 17.7" W | 2  |
| BLUM | BLUME 35     | Blumenau               | SC | 26° 54' 32.1" S / 49° 4' 22.7" W  | 2  |
| BLUM | BLUME 36     | Blumenau               | SC | 26° 54' 58" S / 49° 3' 52.9" W    | 1  |
| BLUM | BLUME 4      | Indaial                | SC | 26° 54' 9.4" S / 49° 14' 45.2" W  | 1  |
| BLUM | BLUME 5      | Indaial                | SC | 26° 55' 39.6" S / 49° 16' 40.6" W | 2  |
| BLUM | BLUME 7      | Ascurra                | SC | 26° 58' 2.5" S / 49° 20' 22.4" W  | 1  |
| SJOS | BIGU 1       | Biguaçu                | SC | 27° 28' 14.1" S / 48° 38' 25.6" W | 3  |
| SJOS | BIGU 10      | Governador Celso Ramos | SC | 27° 21' 38.7" S / 48° 35' 52.2" W | 2  |
| SJOS | BIGU 11      | Biguaçu                | SC | 27° 22' 59.9" S / 48° 38' 18.5" W | 1  |
| SJOS | BIGU 12      | Biguaçu                | SC | 27° 31' 32.3" S / 48° 38' 48.5" W | 2  |
| SJOS | BIGU 4       | Governador Celso Ramos | SC | 27° 25' 43.4" S / 48° 35' 23.1" W | 2  |
| SJOS | BIGU 5       | Governador Celso Ramos | SC | 27° 25' 19.6" S / 48° 34' 18.9" W | 1  |
| SJOS | BIGU 6       | Governador Celso Ramos | SC | 27° 23' 54.9" S / 48° 33' 52.3" W | 2  |
| SJOS | BIGU 7       | Governador Celso Ramos | SC | 27° 22' 40.3" S / 48° 33' 37.5" W | 3  |
| SJOS | BIGU 8       | Governador Celso Ramos | SC | 27° 20' 11.2" S / 48° 32' 40.3" W | 1  |
| SJOS | BIGU 9       | Governador Celso Ramos | SC | 27° 19' 53.5" S / 48° 32' 28.7" W | 2  |
| SJOS | PALHO 10     | Palhoça                | SC | 27° 54' 9.5" S / 48° 35' 35.8" W  | 3  |
| SJOS | PALHO 11     | Palhoça                | SC | 27° 53' 31.2" S / 48° 35' 9.9" W  | 1  |
| SJOS | PALHO 12     | Palhoça                | SC | 27° 47' 28" S / 48° 38' 7.1" W    | 3  |

|      |          |                        |    |                                   |   |
|------|----------|------------------------|----|-----------------------------------|---|
| SJOS | PALHO 3  | Palhoça                | SC | 27° 36' 36.7" S / 48° 41' 20.4" W | 3 |
| SJOS | PALHO 4  | Palhoça                | SC | 27° 36' 9.4" S / 48° 40' 12.2" W  | 2 |
| SJOS | PALHO 5  | Palhoça                | SC | 27° 39' 13.4" S / 48° 40' 54.1" W | 1 |
| SJOS | PALHO 7  | Palhoça                | SC | 27° 40' 49.2" S / 48° 41' 55.3" W | 1 |
| SJOS | PALHO 8  | Palhoça                | SC | 27° 40' 56" S / 48° 42' 34.6" W   | 1 |
| SJOS | SJOS 11  | São José               | SC | 27° 35' 47.9" S / 48° 38' 23.1" W | 1 |
| SJOS | SJOS 12  | São José               | SC | 27° 35' 3.9" S / 48° 38' 21.6" W  | 1 |
| SJOS | SJOS 13  | São José               | SC | 27° 35' 41.5" S / 48° 41' 1.9" W  | 1 |
| SJOS | SJOS 14  | São José               | SC | 27° 35' 8.7" S / 48° 43' 6.2" W   | 3 |
| SJOS | SJOS 6   | São José               | SC | 27° 33' 49.7" S / 48° 38' 36.1" W | 2 |
| SJOS | SJOS 9   | São José               | SC | 27° 35' 16.6" S / 48° 37' 9.6" W  | 1 |
| SJOS | SJOZ 1   | São José               | SC | 27° 36' 47.5" S / 48° 37' 45" W   | 3 |
| SJOS | SJOZ 4   | São José               | SC | 27° 38' 20.3" S / 48° 38' 7.9" W  | 1 |
| SJOS | SPAL 1   | São Pedro de Alcântara | SC | 27° 34' 11.7" S / 48° 45' 25.2" W | 4 |
| SJOS | SPAL 2   | São Pedro de Alcântara | SC | 27° 34' 7.6" S / 48° 47' 41.1" W  | 3 |
| SJOS | TIJU 2   | Tijucas                | SC | 27° 13' 51.3" S / 48° 38' 45" W   | 3 |
| ISCA | FLORI 1  | Florianópolis          | SC | 27° 42' 19.7" S / 48° 33' 22.5" W | 1 |
| ISCA | FLORI 11 | Florianópolis          | SC | 27° 29' 6.6" S / 48° 25' 12.6" W  | 1 |
| ISCA | FLORI 12 | Florianópolis          | SC | 27° 27' 54.1" S / 48° 24' 21.6" W | 1 |
| ISCA | FLORI 13 | Florianópolis          | SC | 27° 26' 7.5" S / 48° 24' 25.5" W  | 1 |
| ISCA | FLORI 15 | Florianópolis          | SC | 27° 35' 57.1" S / 48° 30' 59.6" W | 1 |
| ISCA | FLORI 16 | Florianópolis          | SC | 27° 39' 9.7" S / 48° 31' 0.7" W   | 1 |
| ISCA | FLORI 17 | Florianópolis          | SC | 27° 37' 28.3" S / 48° 31' 32.9" W | 1 |
| ISCA | FLORI 18 | Florianópolis          | SC | 27° 25' 34.8" S / 48° 26' 58.2" W | 1 |
| ISCA | FLORI 19 | Florianópolis          | SC | 27° 23' 42.1" S / 48° 26' 0.7" W  | 1 |
| ISCA | FLORI 2  | Florianópolis          | SC | 27° 43' 27.5" S / 48° 33' 48.3" W | 1 |
| ISCA | FLORI 20 | Florianópolis          | SC | 27° 29' 7.9" S / 48° 29' 37.9" W  | 1 |
| ISCA | FLORI 21 | Florianópolis          | SC | 27° 31' 27.3" S / 48° 28' 4.1" W  | 1 |
| ISCA | FLORI 22 | Florianópolis          | SC | 27° 46' 50" S / 48° 31' 18.8" W   | 1 |
| ISCA | FLORI 23 | Florianópolis          | SC | 27° 47' 7.4" S / 48° 31' 56.6" W  | 2 |
| ISCA | FLORI 24 | Florianópolis          | SC | 27° 47' 38.2" S / 48° 32' 3.4" W  | 1 |
| ISCA | FLORI 25 | Florianópolis          | SC | 27° 42' 58.7" S / 48° 30' 35.9" W | 2 |
| ISCA | FLORI 26 | Florianópolis          | SC | 27° 44' 18.5" S / 48° 30' 34.7" W | 4 |
| ISCA | FLORI 28 | Florianópolis          | SC | 27° 42' 26.8" S / 48° 31' 6.4" W  | 2 |
| ISCA | FLORI 29 | Florianópolis          | SC | 27° 42' 4.3" S / 48° 33' 5.6" W   | 2 |
| ISCA | FLORI 3  | Florianópolis          | SC | 27° 44' 50.2" S / 48° 33' 34.5" W | 1 |
| ISCA | FLORI 30 | Florianópolis          | SC | 27° 43' 27.4" S / 48° 33' 48.5" W | 2 |
| ISCA | FLORI 31 | Florianópolis          | SC | 27° 29' 58" S / 48° 29' 31.6" W   | 1 |
| ISCA | FLORI 32 | Florianópolis          | SC | 27° 36' 18.6" S / 48° 28' 31" W   | 2 |
| ISCA | FLORI 33 | Florianópolis          | SC | 27° 34' 36.9" S / 48° 25' 57.5" W | 2 |
| ISCA | FLORI 34 | Florianópolis          | SC | 27° 26' 7.4" S / 48° 27' 39.5" W  | 2 |
| ISCA | FLORI 35 | Florianópolis          | SC | 27° 26' 40.5" S / 48° 29' 20" W   | 2 |
| ISCA | FLORI 36 | Florianópolis          | SC | 27° 26' 50.5" S / 48° 31' 44.5" W | 1 |
| ISCA | FLORI 37 | Florianópolis          | SC | 27° 30' 52.4" S / 48° 30' 48" W   | 2 |



|      |          |                           |    |                                   |   |
|------|----------|---------------------------|----|-----------------------------------|---|
| ISCA | FLORI 38 | Florianópolis             | SC | 27° 32' 29.3" S / 48° 30' 18.8" W | 1 |
| ISCA | FLORI 39 | Florianópolis             | SC | 27° 26' 36.1" S / 48° 29' 9.7" W  | 1 |
| ISCA | FLORI 4  | Florianópolis             | SC | 27° 48' 12.5" S / 48° 33' 53.5" W | 1 |
| ISCA | FLORI 45 | Florianópolis             | SC | 27° 35' 1.9" S / 48° 25' 60" W    | 2 |
| ISCA | FLORI 47 | Florianópolis             | SC | 27° 35' 30.2" S / 48° 29' 45.6" W | 1 |
| ISCA | FLORI 5  | Florianópolis             | SC | 27° 46' 54.1" S / 48° 31' 34.3" W | 1 |
| ISCA | FLORI 6  | Florianópolis             | SC | 27° 42' 52.6" S / 48° 30' 37.6" W | 1 |
| ISCA | FLORI 7  | Florianópolis             | SC | 27° 39' 44.1" S / 48° 29' 21.2" W | 1 |
| ISCA | FLORI 8  | Florianópolis             | SC | 27° 38' 8" S / 48° 28' 19" W      | 1 |
| PRUD | GUAMIR 1 | Guamiranga                | PR | 25° 11' 41.4" S / 50° 48' 50.4" W | 1 |
| PRUD | IMBIT 1  | Imbituva                  | PR | 25° 13' 36.4" S / 50° 37' 1.7" W  | 3 |
| PRUD | IMBIT 3  | Imbituva                  | PR | 25° 13' 40.1" S / 50° 36' 29.5" W | 2 |
| PRUD | IMBIT 8  | Imbituva                  | PR | 25° 14' 22.9" S / 50° 35' 19.6" W | 2 |
| PRUD | IRATI 1  | Irati                     | PR | 25° 28' 32.8" S / 50° 39' 49.5" W | 1 |
| PRUD | IRATI 2  | Irati                     | PR | 25° 29' 17.1" S / 50° 38' 55" W   | 1 |
| PRUD | IRATI 3  | Irati                     | PR | 25° 28' 58.7" S / 50° 38' 57.6" W | 1 |
| PRUD | IRATI 5  | Irati                     | PR | 25° 28' 33.8" S / 50° 39' 57.8" W | 1 |
| PRUD | IRATI 6  | Irati                     | PR | 25° 28' 6.5" S / 50° 38' 26.7" W  | 3 |
| PRUD | PRUDE 1  | Guamiranga                | PR | 25° 11' 49.2" S / 50° 46' 33.3" W | 1 |
| PRUD | PRUDE 12 | Prudentópolis             | PR | 25° 12' 53.4" S / 51° 0' 42" W    | 1 |
| PRUD | PRUDE 13 | Prudentópolis             | PR | 25° 13' 18.1" S / 50° 58' 59.6" W | 1 |
| PRUD | PRUDE 14 | Prudentópolis             | PR | 25° 12' 22.2" S / 50° 57' 53.5" W | 2 |
| PRUD | PRUDE 15 | Prudentópolis             | PR | 25° 12' 20.7" S / 50° 58' 56.9" W | 2 |
| PRUD | PRUDE 2  | Guamiranga                | PR | 25° 11' 35.6" S / 50° 48' 41.1" W | 3 |
| PRUD | PRUDE 6  | Prudentópolis             | PR | 25° 12' 15.3" S / 50° 58' 19" W   | 1 |
| PRUD | PRUDE 8  | Prudentópolis             | PR | 25° 12' 41.8" S / 50° 59' 28.8" W | 1 |
| PUNI | UNVI 1   | Porto União               | SC | 26° 14' 13.7" S / 51° 4' 41.3" W  | 3 |
| PUNI | UNVI 12  | União da Vitória          | PR | 26° 13' 43.7" S / 51° 4' 24" W    | 1 |
| PUNI | UNVI 13  | União da Vitória          | PR | 26° 13' 56.8" S / 51° 4' 19.6" W  | 3 |
| PUNI | UNVI 14  | União da Vitória          | PR | 26° 12' 50.5" S / 51° 4' 53.3" W  | 2 |
| PUNI | UNVI 15  | Porto União               | SC | 26° 15' 12" S / 51° 4' 26.9" W    | 1 |
| PUNI | UNVI 2   | Porto União               | SC | 26° 15' 15.4" S / 51° 5' 20.3" W  | 1 |
| PUNI | UNVI 3   | União da Vitória          | PR | 26° 14' 15.9" S / 51° 5' 23.5" W  | 1 |
| PUNI | UNVI 5   | União da Vitória          | PR | 26° 12' 39.5" S / 51° 5' 9.9" W   | 1 |
| PUNI | UNVI 6   | União da Vitória          | PR | 26° 15' 56.9" S / 51° 6' 12.6" W  | 1 |
| PUNI | UNVI 7   | União da Vitória          | PR | 26° 13' 56.6" S / 51° 3' 30.1" W  | 1 |
| PUNI | UNVI 8   | União da Vitória          | PR | 26° 14' 6.4" S / 51° 5' 27.4" W   | 6 |
| FOZI | CAZU 4   | Céu Azul                  | PR | 25° 8' 42.9" S / 53° 50' 18.2" W  | 2 |
| FOZI | FOZ 10   | Foz do Iguaçu             | PR | 25° 28' 19.8" S / 54° 35' 14.7" W | 1 |
| FOZI | FOZ 11   | Foz do Iguaçu             | PR | 25° 26' 43.8" S / 54° 30' 11.7" W | 3 |
| FOZI | FOZ 12   | Foz do Iguaçu             | PR | 25° 28' 18.6" S / 54° 30' 39.5" W | 1 |
| FOZI | FOZ 13   | Santa Terezinha de Itaipu | PR | 25° 27' 5.1" S / 54° 24' 6" W     | 2 |
| FOZI | FOZ 14   | Foz do Iguaçu             | PR | 25° 28' 47.2" S / 54° 30' 32.7" W | 2 |
| FOZI | FOZ 5    | Foz do Iguaçu             | PR | 25° 32' 21" S / 54° 33' 1.8" W    | 1 |

|      |          |                           |    |                                   |   |
|------|----------|---------------------------|----|-----------------------------------|---|
| FOZI | FOZ 6    | Foz do Iguaçu             | PR | 25° 32' 33.8" S / 54° 33' 11.7" W | 1 |
| FOZI | FOZ 7    | Foz do Iguaçu             | PR | 25° 30' 47.2" S / 54° 33' 20.7" W | 2 |
| FOZI | FOZ 8    | Foz do Iguaçu             | PR | 25° 29' 49.8" S / 54° 34' 48.6" W | 2 |
| FOZI | FOZ 9    | Foz do Iguaçu             | PR | 25° 28' 19.5" S / 54° 35' 6.7" W  | 1 |
| FOZI | LIND 3   | Lindoeste                 | PR | 25° 16' 0.1" S / 53° 34' 23.1" W  | 1 |
| FOZI | SLUC 1   | Santa Lúcia               | PR | 25° 24' 26.5" S / 53° 34' 2.7" W  | 1 |
| FOZI | SMAR 1   | Santa Maria               | PR | 25° 8' 35.3" S / 53° 35' 11.3" W  | 1 |
| FOZI | SMI 2    | São Miguel do Iguaçu      | PR | 25° 21' 27.5" S / 54° 15' 2" W    | 1 |
| FOZI | STI 2    | Santa Terezinha de Itaipu | PR | 25° 26' 1.5" S / 54° 23' 46.4" W  | 1 |
| FOZI | STO 1    | Santa Tereza do Oeste     | PR | 25° 3' 26.9" S / 53° 37' 1.2" W   | 1 |
| TSAM | MIRP 2   | Mirante do Paranapanema   | SP | 22° 18' 0.6" S / 51° 54' 19.8" W  | 4 |
| TSAM | PIRAPZ 5 | Pirapozinho               | SP | 22° 16' 29.3" S / 51° 29' 17.8" W | 2 |
| TSAM | PPRU 2   | Presidente Prudente       | SP | 22° 7' 20.2" S / 51° 24' 11" W    | 1 |
| TSAM | SANA 1   | Santo Anastácio           | SP | 21° 58' 37.1" S / 51° 39' 10.1" W | 4 |
| TSAM | SANA 3   | Santo Anastácio           | SP | 21° 58' 17.7" S / 51° 39' 32.3" W | 2 |
| TSAM | SANA 4   | Santo Anastácio           | SP | 21° 58' 42.6" S / 51° 39' 25.8" W | 2 |
| TSAM | TSAM 17  | Teodoro Sampaio           | SP | 22° 31' 50.1" S / 52° 9' 49.4" W  | 2 |
| TSAM | TSAM 2   | Teodoro Sampaio           | SP | 22° 37' 12" S / 52° 10' 14.9" W   | 1 |
| TSAM | TSAM 20  | Teodoro Sampaio           | SP | 22° 34' 30.8" S / 52° 10' 44.1" W | 2 |
| TSAM | TSAM 4   | Teodoro Sampaio           | SP | 22° 31' 52.3" S / 52° 10' 42.3" W | 1 |

**Table S2.** Mitochondrial DNA haplotype frequency in 24 *Bombus morio* populations. N: number of individuals. Population abbreviations as in Table 1.

|     | TERE | RESE | PASQ | ANGR | IGRA | IANC | ITMD | SSEB | IBEL | IBUZ | IVIT | GUAP | ICOM | ICAR | APIA | GUAR | IMEL | BLUM | SJOS | ISCA | PRUD | PUNI | FOZI | TSAM | TOTAL |
|-----|------|------|------|------|------|------|------|------|------|------|------|------|------|------|------|------|------|------|------|------|------|------|------|------|-------|
| N   | 20   | 27   | 23   | 47   | 60   | 16   | 5    | 54   | 51   | 12   | 5    | 28   | 21   | 21   | 20   | 20   | 20   | 21   | 57   | 49   | 26   | 17   | 23   | 16   | 659   |
| H1  | 1    |      |      | 2    | 9    | 1    |      |      |      |      |      |      |      |      |      |      |      |      |      |      |      |      |      |      | 13    |
| H2  | 13   |      | 3    | 4    | 2    |      |      |      |      |      |      |      |      |      |      |      |      |      | 1    |      |      |      |      |      | 23    |
| H3  | 3    | 3    | 1    | 6    | 15   | 3    | 2    | 7    | 6    | 8    | 5    | 8    | 6    | 9    | 1    | 3    | 5    | 3    | 9    | 6    | 1    | 1    | 4    |      | 115   |
| H4  | 1    | 4    | 4    |      |      |      |      | 6    | 10   | 2    |      |      |      |      | 2    |      |      |      |      |      |      |      |      |      | 29    |
| H5  | 1    |      |      |      |      |      |      |      |      |      |      |      |      |      |      |      |      |      |      |      |      |      |      |      | 1     |
| H6  | 1    |      |      |      |      |      |      |      |      |      |      |      |      |      |      |      |      |      |      |      |      |      |      |      | 1     |
| H7  |      | 1    |      | 1    |      |      | 1    |      |      |      |      | 1    |      |      |      |      |      |      |      |      |      |      |      |      | 4     |
| H8  |      |      |      | 4    |      |      |      |      |      |      |      |      |      | 1    |      |      | 1    | 1    |      |      |      |      |      |      | 7     |
| H9  |      | 3    | 3    | 4    | 12   |      |      |      |      |      |      |      |      |      |      |      |      |      |      |      |      |      |      |      | 22    |
| H10 |      | 1    | 3    | 3    | 4    | 2    | 1    | 7    | 3    |      |      | 5    | 3    |      |      | 2    |      | 3    |      |      |      |      | 3    |      | 40    |
| H11 |      |      |      | 2    |      | 1    |      | 2    | 1    |      |      |      |      |      |      |      |      |      |      |      |      |      |      |      | 6     |
| H12 |      |      |      | 1    | 1    |      |      |      |      | 1    |      |      |      |      |      |      |      | 1    | 4    | 2    | 1    |      |      |      | 11    |
| H13 |      | 6    |      | 2    |      |      |      | 4    | 5    |      |      |      |      |      |      |      |      |      |      |      |      |      |      |      | 17    |
| H14 |      | 4    | 4    | 3    | 2    |      |      | 1    | 2    |      |      | 2    |      |      | 1    | 1    |      | 3    | 6    | 3    | 2    | 3    | 6    |      | 43    |
| H15 |      |      |      | 1    |      |      |      |      |      |      |      |      |      |      |      |      |      |      |      |      |      |      |      |      | 1     |
| H16 |      |      |      | 2    | 3    | 4    |      |      |      |      |      |      |      |      |      | 2    |      |      |      | 1    |      |      |      |      | 12    |
| H17 |      |      | 2    | 2    |      |      |      |      | 1    |      |      |      |      |      |      |      |      |      |      |      |      |      |      |      | 5     |
| H18 |      | 1    |      | 2    |      |      |      |      |      |      |      |      |      |      |      |      |      |      |      |      | 2    |      | 1    |      | 6     |
| H19 |      |      |      | 2    |      |      |      | 4    |      |      |      |      |      |      |      |      |      |      |      |      |      |      |      |      | 6     |
| H20 |      |      |      | 1    |      |      |      |      |      |      |      |      |      |      |      |      |      |      |      |      |      |      |      |      | 1     |
| H21 |      |      |      | 1    |      |      |      |      |      |      |      |      |      |      |      |      |      |      |      |      |      |      |      |      | 1     |
| H22 |      |      |      | 1    | 2    |      |      |      |      |      |      |      |      |      |      |      |      |      |      |      |      |      |      |      | 3     |
| H23 |      |      |      | 1    |      |      |      | 3    | 4    |      |      |      |      |      |      |      |      |      |      |      |      |      |      |      | 8     |
| H24 |      |      |      | 1    |      |      |      | 5    | 3    |      |      | 2    |      |      |      | 1    |      |      | 4    | 10   |      |      |      |      | 26    |
| H25 |      |      |      | 1    |      |      |      |      |      |      |      |      |      |      |      |      |      |      |      |      |      |      |      |      | 1     |
| H26 |      |      |      |      |      | 1    | 1    | 1    | 1    |      |      |      | 1    | 2    |      |      |      | 2    |      |      |      |      |      |      | 9     |
| H27 |      |      |      |      |      |      |      |      |      |      |      |      |      |      |      | 1    |      | 2    | 3    | 4    | 1    |      |      |      | 11    |
| H28 |      |      |      |      |      |      |      |      |      |      |      |      |      |      |      | 1    |      | 1    |      |      |      |      |      |      | 2     |
| H29 |      |      |      |      |      |      |      |      |      |      |      |      |      |      |      |      |      | 1    | 2    | 1    |      |      |      |      | 4     |
| H30 |      |      |      |      |      |      |      |      |      |      |      |      |      |      |      |      |      | 1    |      |      |      |      |      |      | 1     |
| H31 |      |      |      |      |      |      |      |      |      |      |      |      |      |      |      |      |      | 2    | 2    | 1    |      |      |      |      | 5     |
| H32 |      |      |      |      |      |      |      |      |      |      |      |      |      |      |      |      |      | 1    | 2    |      |      |      |      |      | 3     |
| H33 |      |      |      |      |      |      |      |      |      |      |      |      |      |      |      |      |      |      |      |      |      |      | 1    |      | 1     |
| H34 |      |      |      |      |      |      |      |      |      |      |      |      |      |      |      |      |      |      |      |      |      |      | 1    |      | 1     |
| H35 |      |      |      |      |      |      |      |      |      |      |      |      |      |      |      |      |      |      |      |      |      |      | 1    |      | 1     |
| H36 |      |      |      |      |      |      |      |      |      |      |      |      |      |      | 1    | 1    | 8    |      |      | 1    | 3    |      | 1    |      | 15    |
| H37 |      |      |      |      |      |      |      |      |      |      |      |      |      |      |      |      |      |      |      |      | 1    |      | 1    |      | 2     |
| H38 |      |      |      |      | 1    | 1    |      | 5    | 6    |      |      |      |      |      | 1    | 1    |      |      |      |      | 2    |      | 1    |      | 18    |





**Table S3.** Genetic diversity for the loci utilized in 659 individuals of *Bombus morio*.  $N_a$ : number of alleles.  $H_E$ : expected heterozygosity.

| Locus                             | $N_a$          | $H_E$           |
|-----------------------------------|----------------|-----------------|
| <b>Bm1</b>                        | 21             | 0.861           |
| <b>Bm3</b>                        | 12             | 0.823           |
| <b>Bm4</b>                        | 20             | 0.803           |
| <b>Bm5</b>                        | 10             | 0.740           |
| <b>Bm7</b>                        | 4              | 0.420           |
| <b>Bm9</b>                        | 8              | 0.670           |
| <b>Bm10</b>                       | 11             | 0.728           |
| <b>Bm11</b>                       | 26             | 0.918           |
| <b>Bm12</b>                       | 9              | 0.528           |
| <b>Bm13</b>                       | 10             | 0.738           |
| <b>Bm17</b>                       | 17             | 0.751           |
| <b>Bm18</b>                       | 18             | 0.888           |
| <b>BT01</b>                       | 12             | 0.764           |
| <b>BT06</b>                       | 19             | 0.878           |
|                                   |                |                 |
| <b>Mean (<math>\pm</math> se)</b> | 14.1 $\pm$ 1.6 | 0.75 $\pm$ 0.04 |
